# Supplementary material for: Diffraction-limit-breaking digital projection lithography via multi-exposure strategies for high-density nanopatterning
Source: Research Square preprint supplement (doi:10.21203/rs.3.rs-7290332/v1), 2025-08-14
Supplement: Supplementary file 1 [file 3008c86c4aa35b8876c2c801.docx]

**Diffraction-Limit-Breaking Digital Projection Lithography via Multi-Exposure Strategies for High-Density Nanopatterning**

Zi-Xin Liang1,2,3, Jing-Tao Chen1,2,3, Yuan-Yuan Zhao1,2,*, Wen-Hui Li1,2, Jing Zhou1,2, and Xuan-Ming Duan1,2,*

1 *Guangdong Provincial Key Laboratory of Optical Fiber Sensing and Communication, Institute of Photonic Technology, Jinan University, Guangzhou* 511443*, China*;2 *College of Physics & Optoelectronic Engineering , Jinan University, Guangzhou* 510632*, China*

3*The authors contributed equally to this work*

**E-mail: yyzhao@jnu.edu.cn, xmduan@jnu.edu.cn*

**Contents:**

1. **Diffraction analysis of DMD-based maskless projection lithography**
2. **Projection field calculation**
3. **Fast coloring for resolving rule conflicts**
4. **Gradient descent-based layout decomposition for resolving rule conflicts**
5. **Using genetic algorithm to maximize spacing uniformity**
6. **Algorithm validation using two-photon absorption projection system**
7. **Experimental details on enhanced resolution through dual-exposure lithography**
8. **Diffraction analysis of DMD-based maskless projection lithography**

Since we use parallel light to irradiate the DMD, according to the characteristics of the DMD, when the pixel is turned on, it is rotated by so that each pixel will have a phase difference along the incident direction, which is similar to a blazed grating. To analyze the DMPL system model, we must first analyze the diffraction properties of the DMPL. is the angle between the illumination parallel light and the optical axis, and is the outgoing direction of the light, which satisfies the following formula:

(S1)

Because the rotation angle is small, we ignore the shape transformation of the matrix during diagonal rotation, and the complex amplitude transmittance of a single DMD pixel is:

(S2)

where is the wave vector, and is the single DMD pixel’s size. For the convenience of discussion, the duty cycle of the digital mask pixel is 100%, that is . We first assume that the complex amplitude transmittance when the DMD pixels are all in ON mode is:

(S3)

(S4)

Among them, is the DMD pixel’s period and it is 7.56um in this paper, and the frequency spectrum is calculated:

(S5)

(S6)

(S7)

where is the wavelength and it is 517nm in this paper. In our DMPL system, the placement position of the DMD is fixed and perpendicular to the optical axis. It should be noted that due to the system design NA, only one diffraction order may enter the projection system for imaging. At the same time, the position of the diffraction order is required to be at the center of the spectrum, which is similar to the on-axis illumination in physical mask lithography. If the diffraction order is not at the center of the spectrum, it is similar to the oblique illumination. This will lead to different degrees of information loss in the layout of different orientations. It can be seen from Eq.7 that different incident angles lead to different moving distances of the diffraction orders. To satisfy that the position where a certain diffraction order exists must be in the center of the spectrum:

(S8)

It is calculated that when , there is a diffraction order in the center of the spectrum, and its diffraction efficiency is the largest. At this time, , by calculation. Considering that DMD loads the arbitrary layout, and we do not consider the phase between the pixels, then the complex amplitude transmittance can be expressed as follows:

(S9)

where is the state quantity of the pixel in row *i* and column *j* of the DMD, equal to 1 means the state is on, and equal to 0 means the state is off. If the phase relationship between DMD pixels is considered, when DMD is loaded with modulation coefficient *M*, the complex amplitude transmittance is:

(S10)

The spectrum corresponding to :

(S11)

It can be seen that there are multiple blazed orders carrying object information, but only one order at the center of the spectrum is collected by the projection system. The spectrum of the object is modulated by the envelope , but the envelope is very large relative to the pupil function of the whole system. In the range of the pupil, the envelope is very close, which can be regarded as the frequency modulation of the constant term, so there is the following approximation:

(S12)

After the proof is completed, the phase difference between adjacent pixels of the DMD is no longer considered in the subsequent simulation, and the DMD is regarded as a binary amplitude SLM.

1. **Projection field calculation**

The point spread function hp, with TC as the sampling interval, is a fundamental component of the entire light field computation. We define two coordinate systems: a global coordinate system (*x, y, z*) and a local coordinate system (*s, p, k*)，considering a parallel light ray traveling along a wave vector. Notably, the *s*-axis is always perpendicular to the plane formed by the wave vector k and the *z*-axis, while the *p*-axis lies within the plane formed by the wave vector k and the z-axis. α is the cosine value of the angle between the wave vector and the x-axis, is the cosine value of the angle between the wave vector and the y-axis, is the cosine value of the angle between the wave vector and the z-axis, and satisfies the relationship .

Then, we can get the polarized light field calculated from the object plane mask to the image plane where the sample is located:

(S13)

is the frequency response function of the vector projection optical system considering the point light source:

(S14)

(S15)

(S16)

(S17)

The light field, which is initially described in the frequency domain, is transformed back into the spatial domain through the application of a Fourier transform, from which the point spread function (PSF) is subsequently derived:

(S18)

After the derivation, we denote as the image plane where the photoresist is positioned, and represents the ideal image of the digital mask as it passes through the projection system. Next, we consider the vector model in the spatial domain, incorporating the point spread function for a specific polarization direction and the complex amplitude transmittance of the DMD. Convolution of these elements is performed, followed by the computation of the square of the absolute value of the resulting function. Ultimately, the process yields the light intensity distribution function after the DMD digital mask is applied. In this context, *hp* represents the PSF for a polarization direction, * denotes the convolution operation, and *I* signifies light intensity distribution.

(S19)

1. **Fast coloring for resolving rule conflicts**

To address the resolving rule conflicts, we introduce a conflict graph denoted as , where signifies the set of conflict edges. Whenever the spacing between the node and another node is less than the threshold , a conflict edge is formed between the corresponding polygon nodes. Algorithm S1 assigns features to nodes with linear time complexity and generates feature lists without violating the rules as much as possible. Fig.S1 presents the mask decomposition scheme addressing rule violations. The sub-layout obtained after mask decomposition reduces rule violations and reduces the high-frequency components of the single-exposure mask, making it less affected by defocus, which greatly reduces the PV-band, and greatly improves the process window for dense layouts. Since the objective is to resolve rule violations, polygons not conflicting with the rules are randomly distributed within the sub-layouts. This randomness can lead to sparse layouts in certain regions and dense layouts in others, thereby affecting the further improvement of the process window. In comparison to the decomposition scheme obtained by considering spacing uniformity optimization, the mask decomposition scheme addressing rule violations exhibits the highest values for .

Algorithm.S1 Fast Coloring

Input: coloring number *n*, conflict graph , stack S

Output: mask decomposition scheme

1. Delete the nodes in the conflict graph whose degree is less than *n*-1. If the node is deleted, go to the second step; if there is no node that can be deleted, go to the third step.

2. The nodes deleted in the first step are pushed into the stack S one by one. If the nodes of is not empty, return to the first step. If it is empty, go to the fourth step.

3. Delete the edge with the farthest distance between two polygons in . Return to step 1

4. The stack S pops the nodes out of the stack one by one, and randomly assigns legal feature to the popped nodes (without triggering rule conflicts), until the stack S is empty. Polygons with the same features are assigned to the same sub-layout for exposure.


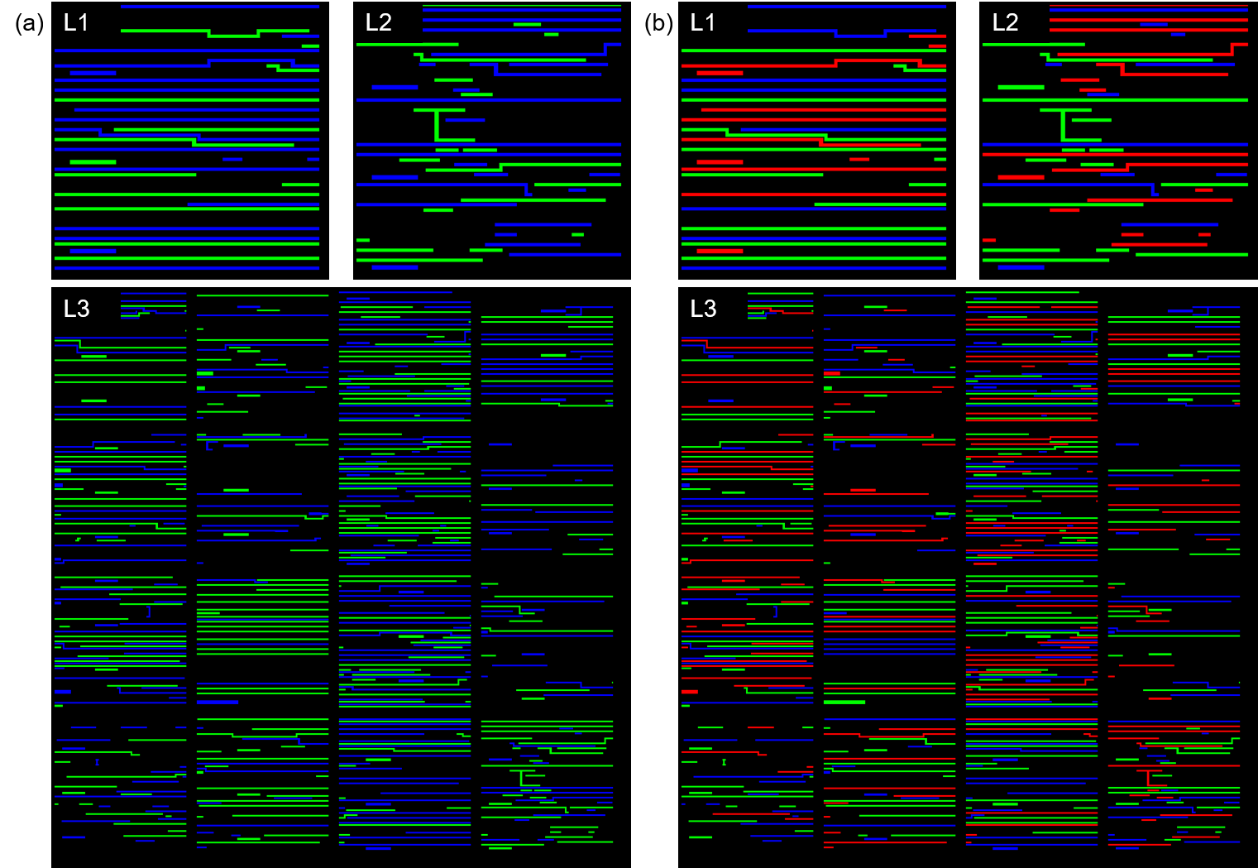


Fig.S1 (a) double exposure decomposition scheme based on Fast coloring; (b) triple exposure decomposition scheme based on Fast coloring.

1. **Gradient descent-based layout decomposition for resolving rule conflicts**

To assess spacing uniformity in layout decomposition schemes, the following evaluation method is employed. The feature spacing of polygon node is defined as the spacing between its nearest polygon. Since it is considered as a digital mask, the unit of spacing is the number of DMD pixels, and the minimum value is 1. For each decomposition scheme *S* corresponds to an ascending list , consisting of the feature spacing of all polygon of the input layout, denoted as . is used for quantitative evaluation of spacing uniformity, expressed as the sum of the reciprocals of feature spacings within that are smaller than the threshold . A smaller indicates superior spacing uniformity. Additionally, the PV-band is employed to gauge the influence of diverse decomposition schemes on the process window, which is defined as the XOR operation between the resist pattern after a 250nm defocusing and the non-defocused resist pattern in this paper.

Our experimental dataset comprises metal layer layouts sourced from the industry. However, these layouts cannot be directly accommodated onto DMD-based digital masks due to their inherently non-uniform linewidths and spacings. To enable seamless loading onto the digital mask, we discretized the layout's line widths and spacing to integer multiples of the DMD pixel size. Following this quantification process, the minimum line width and spacing of the layout are determined to be 2 and 1 DMD pixels, respectively. In addition, when the optical system is projected by 100 times reduction, that is, the minimum physical line width and spacing of our layout are 151.2nm and 75.6nm, respectively.

Algorithm.S2 Maximizing spacing uniformity of mask decomposition scheme based on gradient descent

Input: The mask to be decomposed and the corresponding graph constructed based on Eq.(6).

Initialization: Assign a feature to each polygon node. In the case of double exposures, the feature is a value between 0 and 1. In the case of triple exposures, the feature is a value between -1 and 1.

1. The features of nodes are treated as variables to be optimized. Set up the Adam gradient optimizer.

2. The objective function *Ls* is calculated according to Eq.7. According to the gradient information of back propagation, the optimizer continuously optimizes the features of the nodes.

Output: The Optimized features of the nodes. For double exposure, nodes with features greater than 0.5 are classified as sub-layout 1, and nodes with eigenvalues less than 0.5 are classified as sub-layout 2. Similar to triple exposure, the nodes whose features are greater than 1/3 are divided into sub-layout 1, the features less than -1/3 are divided into sub-layout 2, and the nodes whose features are in other ranges are assigned to sub-layout 3.

1. **Using genetic algorithm to maximize spacing uniformity**

The summation of weights associated with edges connecting nodes sharing the same features is employed as the optimization objective function:

(S20)

where *n* signifies the times of exposures, represents the features of node . A lower value of the function *L* indicates greater spacing uniformity of mask decomposition. Polygons with the same features are assigned to the same sub-layout for exposure.

If each polygon is regarded as a variable, it will lead to a large number of variables, resulting in a decline in the convergence performance of the genetic algorithm. In order to reduce the scale of variables, we propose a genetic algorithm for graph prior knowledge embedding for mask decomposition. As shown in Algorithm S4, the number of multiple exposures *n* needs to be input, and then the input digital mask is processed to establish a conflict graph . At the same time, is divided into multiple subgraphs. Each node in the subgraph is connected to other nodes in the same subgraph by at least one edge. There is no edge between any two nodes from different subgraphs. The set of features (feature list) of all nodes in a subgraph is considered a gene. Genetic algorithm has multiple mutation algorithms as shown in Algorithm S3 to make it jump out of the local optimum. The first mutation algorithm is to randomly transform the feature list of the subgraph. For example, for triple exposure, the original of 1 is changed to 0, the original 2 is changed to 1, and the original 0 is changed to 2. This can make the decomposition of different subgraphs recombine without generating new conflicts to find a more evenly spaced decomposition result. The second mutation algorithm is to randomly pick subgraphs and recalculate the feature list using Algorithm S1.

In order to reduce the computational complexity, in the process of individual initialization, we save multiple feature lists of each subgraph. When it is necessary to recalculate the feature list of a subgraph, we either randomly sample from the saved feature list or recompute a new feature list. This can reduce the running time of the algorithm and ensure that a better decomposition is regenerated with a certain probability to jump out of the local optimum. In particular, in double exposure, the feature list of each submap can simply perform a bitwise NOT operation when mutating. In the gene crossover stage, the feature list of the same subgraph of different individuals are randomly selected and exchanged to generate new individuals.

The genetic algorithm performs well in achieving satisfactory mask decomposition solutions when dealing with small variable scales. However, due to the nature of the genetic algorithm, as variable scales increase, as demonstrated by Layout 3 shown in Table S1, a notable performance decline occurs due to the expanded search space. We briefly discuss the algorithm why genetic algorithms are difficult to solve large-scale layouts, and gradient algorithms are more large-scale friendly. Genetic algorithms require an ample number of individuals to undergo multiple gene mutations and exchanges to break free from local optima, which leads to poorer optimization results and increased runtimes when dealing with larger variable scales.

Input: individual genes, mutation probability

Output: mutated individual genes

1. For the feature of the polygon feature in the subgraph in each individual, perform the following operations：

2. If the random number from 0 to 1 is less than the mutation probability:

3. Randomly transform the feature of polygon features in the subgraph

4. If the random number from 0 to 1 is less than the mutation probability:

5. Recalculate the feature of this subgraph according to Algorithm S1

Algorithm. S3 Individual Gene Mutation Algorithm

Algorithm.S2 Maximizing spacing uniformity of mask decomposition scheme based on gradient descent

Algorithm. S4 Genetic Algorithms for Graph Knowledge Embedding

Input: conflict graph , number of iterations *k*, number of individuals *m*, coloring number *n*

Initialization: Use Algorithm S4 to randomly generate individuals (that is, assign feature values to polygon nodes).

1. The genetic crossover algorithm produces new offspring (that is, exchanging the feature list of the same subgraph in different individuals)

2. The offspring generated in the first step undergo individual gene mutation according to Algorithm S3 (that is, the feature of the node is changed), and the mutated offspring join the old population for step 3.

3. Select individuals in the population to update the new generation population, keeping the number of individuals unchanged. Generally, the higher the fitness of an individual (the lower the cost function), the greater the probability of being selected as a new generation population. Return to step 1 until the number of iterations is satisfied.

Output: Return the individual genes with higher fitness, and the polygon nodes with the same feature will be set as the sub-layout of a certain exposure.


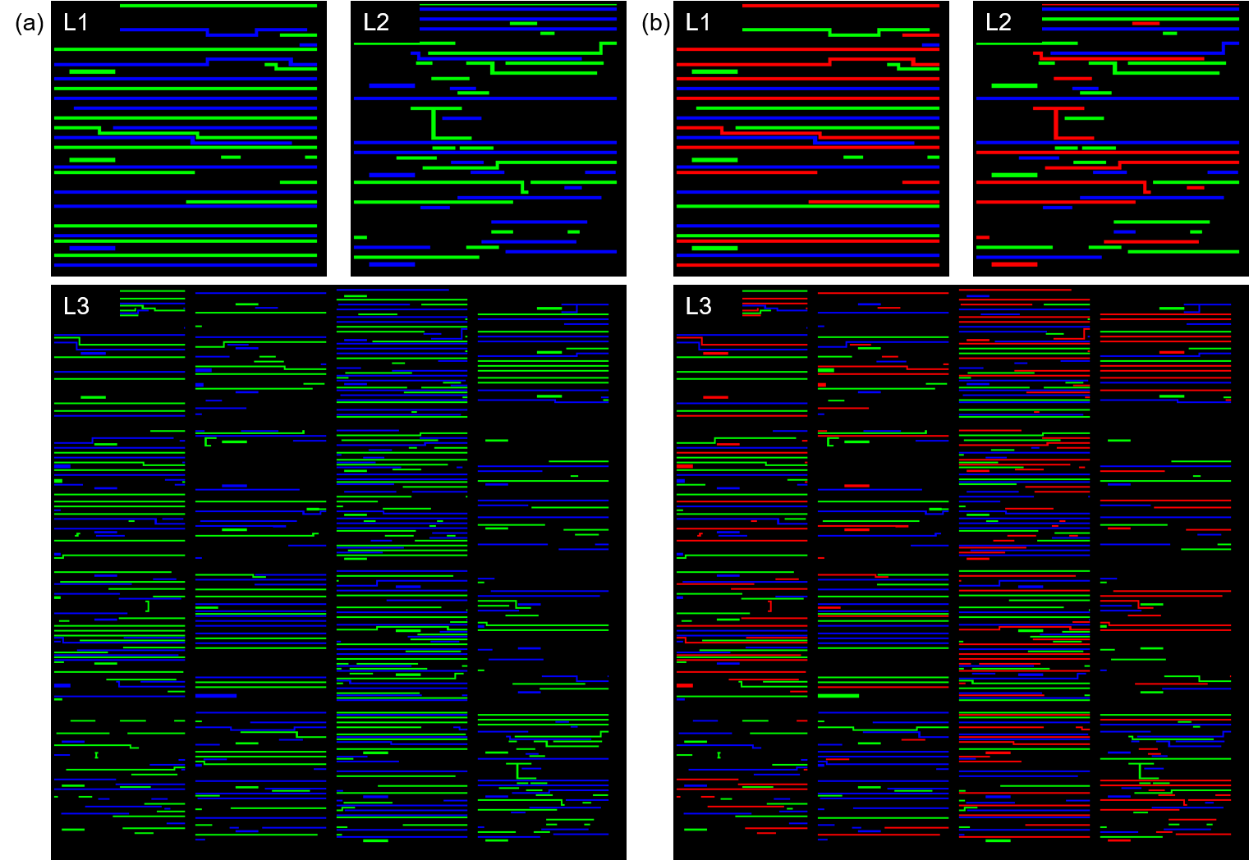


Fig.S2 (a) double exposure decomposition scheme based on GA; (b) triple exposure decomposition scheme based on GA.

Table S1 Comparison of the spacing uniformity between different algorithms

|  |  | One exposure | Double exposure | | | Triple exposure | | |
| --- | --- | --- | --- | --- | --- | --- | --- | --- |
| Method |  |  | fast coloring | GA-LDSU | GD-LDSU | fast coloring | GA-LDSU | GD-LDSU |
| Layout 1  (19×19 μm2) | Pvband(μm2) | 20.25 | 9.21 | 5.93 | 6.32 | 8.19 | 5.79 | 6.08 |
| Sinv | 15.8 | 2.51 | 1.63 | 1.67 | 1.57 | 0.44 | 0.658 |
| Time/s | / | 0.001 | 0.51 | 0.10 | 0.012 | 5.2 | 0.10 |
| Layout 2  (19×19 μm2) | Pvband(μm2) | 18.83 | 8.71 | 7.31 | 7.15 | 7.4 | 4.8 | 5.0 |
| Sinv | 27.79 | 3.52 | 3.09 | 3.26 | 1.75 | 1.24 | 1.3 |
| Time/s | / | 0.001 | 0.79 | 0.12 | 0.0146 | 8.9 | 0.13 |
| Layout 3  (80×80 μm2) | Pvband(μm2) | 297 | 118 | 117 | 109 | 104 | 92 | 74 |
| Sinv | 254 | 34.6 | 33.5 | 28.6 | 20.2 | 16.1 | 10.17 |
| Time/s | / | 0.014 | 44 | 2.3 | 0.177 | 561 | 2.4 |

1. **Algorithm validation using two-photon absorption projection systems**

Validation of the GD-LDSU algorithm was conducted utilizing a projection system based on a Digital Micromirror Device (DMD, DLP6500,19201080 pixels, Texas Instrument), as depicted in Fig.S3. The experimental setup employed a coherent laser with a central wavelength of 517 nm, a pulse width of 238 fs, and a repetition rate of 1 MHz. The beam diameter expanded to 6 mm after passing through 1-3X beam expanders. It has met the input conditions for the shaper (Shaper 6_6_VIS). The output beam from the shaper, a flat-top beam with a diameter of 21 mm, satisfies the illumination requirements for the entire DMD pixel array. Subsequent to loading a binary pattern onto the DMD, the pattern was transferred to the sample through irradiation by the tube lens and the objective lens (NIKON, oil, 100X/1.49NA). The exposure power and duration in the experiment were precisely controlled using the electrically operated attenuator and shutter.


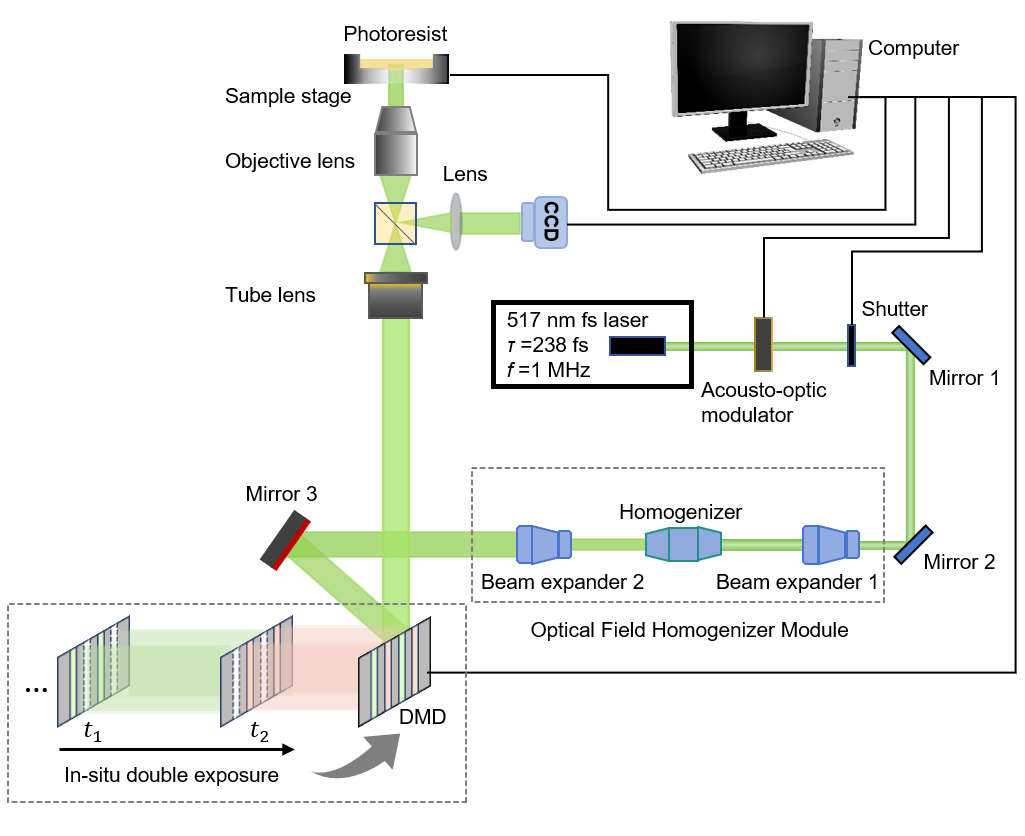


Fig.S3 Surface projection experimental setup.

The manufacturing process is illustrated in Fig.S4. Initially, the glass substrate is cleaned, followed by the deposition of HMDS to enhance adhesion. Subsequently, AR-N-7520 is spin-coated, and the coated substrate is baked at 85°C for 1 minute, aligning and exposing it using an exposure system. In-situ dual-exposure was implemented through dynamic pattern loading using the DMD.

Finally, the designed pattern is transferred onto the photoresist using AR 300-47 developer, and the samples are observed using a scanning tunneling microscope (SEM). We have achieved the enhancement of pitch resolution through a double exposure and single development process, rather than relying on multiple cycles of exposure and development, which significantly improves process flow and efficiency.


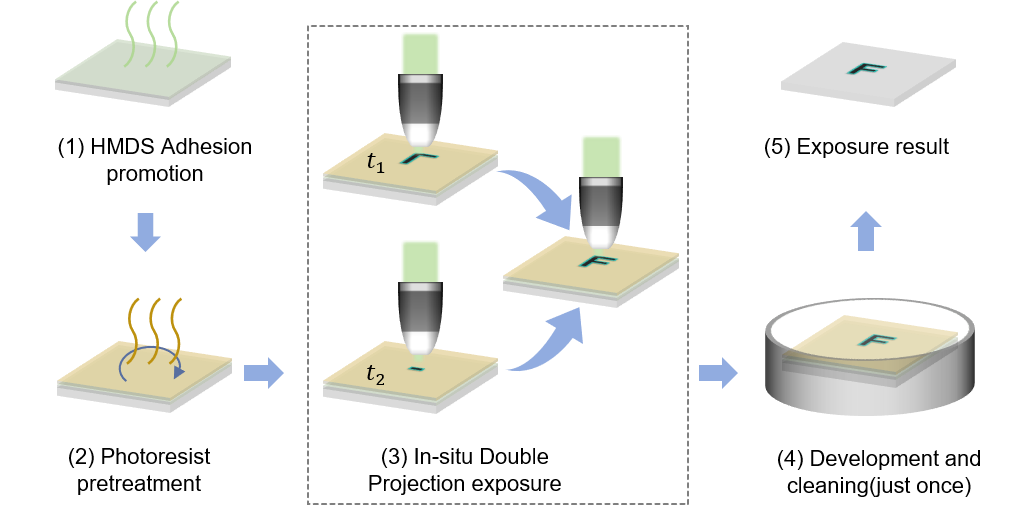


Fig.S4 Fabrication and preparation process.

1. **Experimental details on enhanced resolution through dual-exposure lithography**

Figure S5(a) is an enlarged view of the 2D metal layer layout with DMD discrete pixel distribution characteristics. We can see that the local areas that violate the resolution rule (1, 2, 3, 4 hot spots) have a common feature of a line interval of 1 pixel. The GD-LDSU algorithm can be used to decompose the layout into two double-exposed layouts (light green and light blue) as shown in the enlarged view on the right and bottom of Fig. S5(a).

Figures S5(b,c) show the patterned PAC concentration distribution map corresponding to Fig. S5(a) and the photoresist profile prediction map under a threshold of 0.5 for the single exposure process.


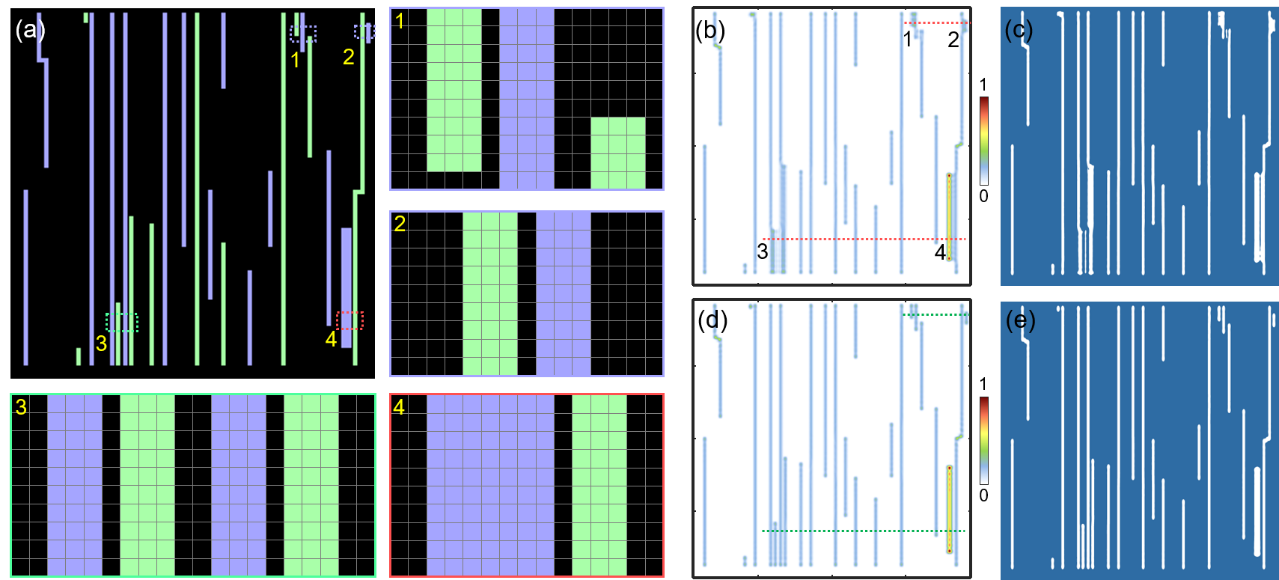


Fig.S5 Analysis of the exposure light field for the metal layer and the morphology of the photoresist (a)The exposure mask layout for the metal layer layout; (b) Patterned PAC concentration distribution map corresponding to (a), one exposure; (c)Photoresist profile prediction map under a threshold of 0.5 under exposure process, one exposure. (d) Patterned PAC concentration distribution map corresponding to (a), double exposure; (e)Photoresist profile prediction map under a threshold of 0.5 under the double exposure process.


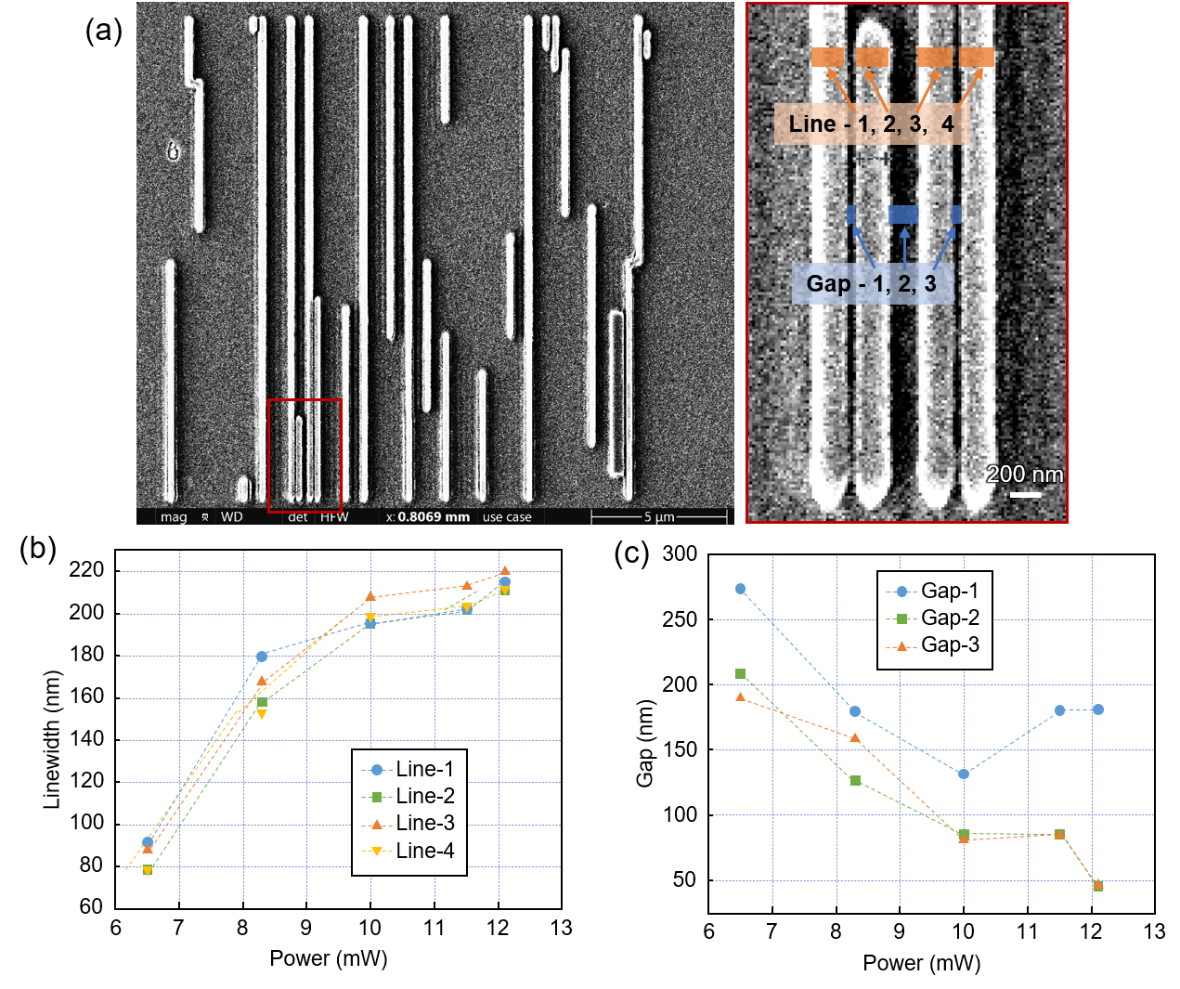


Fig. S6 Variation in (a)The exposure results and partial magnification under P = 12.1 mW and T = 15s; (b) The variation of the linewidths corresponding to them in response to changes in exposure power; (c) The variation of the interstitial gaps corresponding to them in response to changes in exposure power.

To surpass the constraints imposed by optical diffraction, double-exposure lithography has been implemented, significantly improving the resolution of inter-feature spacing and, by extension, broadening the operational process window. This approach is particularly beneficial when dealing with dense line patterns, as illustrated in Fig. S6a. And Fig. S6 (b-c) depicts the changes in four specific lines along with the corresponding three interstices, all in relation to the changes in power.

The interplay between the lines during the exposure sequence can lead to constructive or destructive interference, thereby affecting the periodicity of the pattern. The experimental result, as depicted in Fig. S7 (a), involves a dual-exposure process with an initial exposure time of 15 seconds at a power of 12.1 mW. This initial exposure is followed by a second exposure, which is crucial for the manifestation of the interference effect. The central asymmetry observed in the final pattern, as a result of this interference, can lead to variations in the period of the patterned lines. To quantify this effect, a series of experiments were conducted, as summarized in Fig. S7(b). The data reveals a significant deviation in the period when the second exposure is performed at a power of 10 mW for 15 seconds. This deviation underscores the sensitivity of the process to the exposure parameters and highlights the need for precise control over the exposure conditions to maintain the integrity of the patterned features.


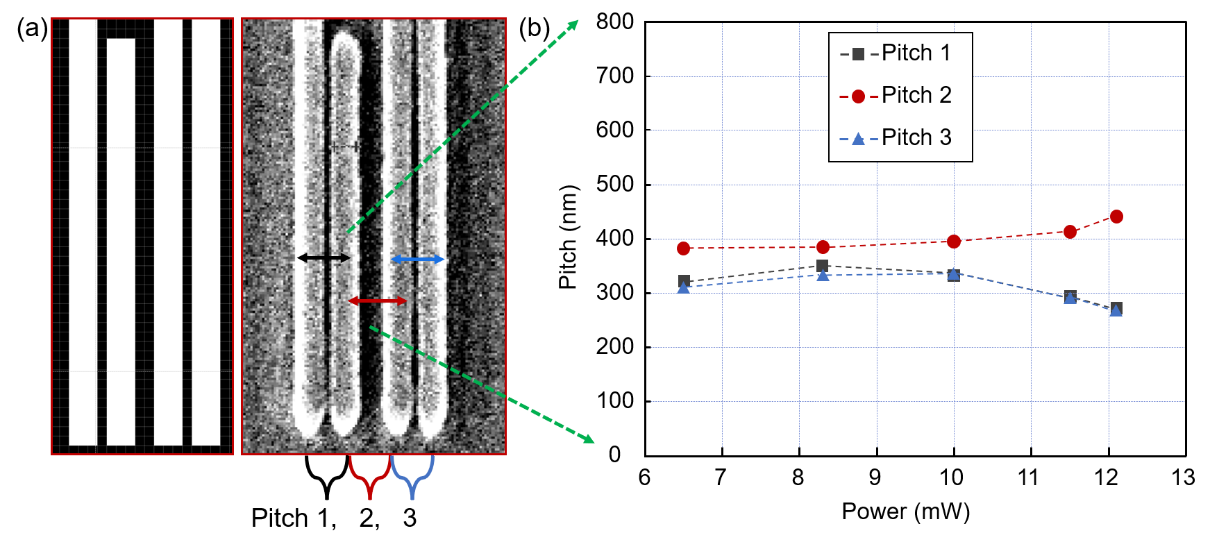


Fig. S7 Variation in the period of densely packed lines under double exposure.(a) The exposure results under P = 12.1 mW and T = 15s, based on the layout of Fig. 6a from the main text；(b) The distribution of three different pitch distances under varying exposure doses.
